# Supplementary material for: Structure–Function Analysis of the Essential Mycobacterium tuberculosis P450 Drug Target, CYP121A1
Source: MDPI journal article supplement (doi:10.3390/ijms25094886), 2024-04-30
Supplement: s1 [file s1]

Article

# Structure–Function Analysis of the Essential *Mycobacterium tuberculosis* P450 Drug Target, CYP121A1

Tiara Padayachee <sup>1</sup>, David C. Lamb <sup>2</sup>, David R. Nelson <sup>3</sup> and Khajamohiddin Syed <sup>1,\*</sup>

<sup>1</sup> Department of Biochemistry and Microbiology, Faculty of Science, Agriculture and Engineering, University of Zululand, Empangeni 3886, South Africa; teez07padayachee@gmail.com

<sup>2</sup> Faculty of Medicine, Health and Life Sciences, Swansea University, Swansea SA2 8PP, UK; d.c.lamb@swansea.ac.uk

<sup>3</sup> Department of Microbiology, Immunology and Biochemistry, University of Tennessee Health Science Center, Memphis, TN 38163, USA; drnelson1@gmail.com

\* Correspondence: syedk@unizulu.ac.za or khajamohiddinsyed@gmail.com; Tel.: +27-035-902-6857

Table S1: 53 CYP121A1 crystal structures active site cavity area, volume, and conformations.

| PDB code | Area (SA) Å <sup>2</sup> | Volume (SA) Å <sup>3</sup> | Conformation |
|----------|--------------------------|----------------------------|--------------|
| 1N4G     | 1228                     | 838                        | Closed       |
| 2IJ7     | 1127                     | 729                        | Closed       |
| 3G5H     | 1185                     | 738                        | Closed       |
| 4G1X     | 1150                     | 790                        | Closed       |
| 4G2G     | 1124                     | 714                        | Closed       |
| 4G44     | 1136                     | 769                        | Closed       |
| 4G45     | 1131                     | 744                        | Closed       |
| 4G46     | 1142                     | 732                        | Closed       |
| 4G47     | 1140                     | 726                        | Closed       |
| 4G48     | 1199                     | 761                        | Closed       |
| 4ICT     | 1166                     | 777                        | Closed       |
| 4IPS     | 1176                     | 746                        | Closed       |
| 4IPW     | 1198                     | 758                        | Closed       |
| 4IQ7     | 1172                     | 744                        | Closed       |
| 4IQ9     | 1187                     | 771                        | Closed       |
| 5EDT     | 1146                     | 726                        | Closed       |
| 5IBD     | 1141                     | 767                        | Closed       |
| 5IBE     | 1139                     | 738                        | Closed       |
| 5IBF     | 1005                     | 730                        | Closed       |
| 5IBG     | 1168                     | 782                        | Closed       |
| 5IBH     | 1155                     | 728                        | Closed       |
| 5IBI     | 1226                     | 794                        | Closed       |
| 5IBJ     | 1186                     | 781                        | Closed       |
| 5OP9     | 994                      | 703                        | Closed       |
| 5OPA     | 1133                     | 745                        | Closed       |
| 5WP2     | 1103                     | 717                        | Closed       |
| 6GEO     | 1226                     | 784                        | Closed       |
| 6GEQ     | 1159                     | 751                        | Closed       |
| 6RQ0     | 1209                     | 778                        | Closed       |
| 6RQ1     | 1148                     | 738                        | Closed       |
| 6RQ3     | 1199                     | 766                        | Closed       |
| 6RQ5     | 1085                     | 690                        | Closed       |
| 6RQ6     | 1165                     | 751                        | Closed       |
| 6RQ8     | 1164                     | 742                        | Closed       |
| 6RQ9     | 1127                     | 739                        | Closed       |
| 6RQB     | 1150                     | 728                        | Closed       |
| 6RQD     | 1159                     | 731                        | Closed       |
| 6TE7     | 1011                     | 698                        | Closed       |
| 6TET     | 1038                     | 703                        | Closed       |
| 6TEV     | 1044                     | 712                        | Closed       |
| 6UPG     | 1103                     | 730                        | Closed       |
| 6UPI     | 993                      | 699                        | Closed       |

|      |      |     |        |
|------|------|-----|--------|
| 7NQM | 1093 | 697 | Closed |
| 7NQN | 1103 | 725 | Closed |
| 7NQO | 1108 | 725 | Closed |
| 1N40 | 1170 | 738 | Open   |
| 2IJ5 | 1169 | 777 | Open   |
| 3CXV | 1175 | 743 | Open   |
| 3G5F | 1158 | 770 | Open   |
| 3CY0 | 1166 | 732 | Open   |
| 3CY1 | 1171 | 727 | Open   |
| 3CXX | 1163 | 722 | Open   |
| 3CXY | 1183 | 782 | Open   |
| 3CXZ | 1215 | 769 | Open   |

Table S2: CYP121A1 member structures were used in the study. The PDB codes and their references are presented.

| PDB code                                             | Reference |
|------------------------------------------------------|-----------|
| 1N4G, 1N40                                           | [1]       |
| 2IJ7, 2IJ5                                           | [2]       |
| 3G5H, 3G5F                                           | [3]       |
| 4G1X, 4G2G, 4G44, 4G45, 4G46, 4G47, 4G48             | [4]       |
| 4ICT, 4IPS, 4IPW, 4IQ7, 4IQ9                         | [5]       |
| 5EDT, 5IBD, 5IBE, 5IBF, 5IBG, 5IBH, 5IBI, 5IBJ       | [6]       |
| 5OP9, 5OPA                                           | [7]       |
| 6GEO, 6GEQ                                           | [8]       |
| 6RQ0, 6RQ1, 6RQ3, 6RQ5, 6RQ6, 6RQ8, 6RQ9, 6RQB, 6RQD | [9]       |
| 6TE7, 6TET, 6TEV                                     | [10]      |
| 6UPG, 6UPI                                           | [11]      |
| 7NQM, 7NQN, 7NQO                                     | [12]      |
| 3CXV                                                 | [13]      |

#### References:

1. Leys, D.; Mowat, C.G.; McLean, K.J.; Richmond, A.; Chapman, S.K.; Walkinshaw, M.D.; Munro, A.W. Atomic structure of Mycobacterium tuberculosis CYP121 to 1.06 Å reveals novel features of cytochrome P450. *The Journal of biological chemistry* **2003**, *278*, 5141-5147, doi:10.1074/jbc.M209928200.
2. Seward, H.E.; Roujeinikova, A.; McLean, K.J.; Munro, A.W.; Leys, D. Crystal structure of the Mycobacterium tuberculosis P450 CYP121-fluconazole complex reveals new azole drug-P450 binding mode. *The Journal of biological chemistry* **2006**, *281*, 39437-39443, doi:10.1074/jbc.M607665200.
3. Belin, P.; Le Du, M.H.; Fielding, A.; Lequin, O.; Jacquet, M.; Charbonnier, J.B.; Lecoq, A.; Thai, R.; Courcon, M.; Masson, C.; et al. Identification and structural basis of the reaction catalyzed by CYP121, an essential cytochrome P450 in Mycobacterium tuberculosis. *Proc Natl Acad Sci U S A* **2009**, *106*, 7426-7431, doi:10.1073/pnas.0812191106.

4. Hudson, S.A.; McLean, K.J.; Surade, S.; Yang, Y.Q.; Leys, D.; Ciulli, A.; Munro, A.W.; Abell, C. Application of fragment screening and merging to the discovery of inhibitors of the Mycobacterium tuberculosis cytochrome P450 CYP121. *Angewandte Chemie (International ed. in English)* **2012**, *51*, 9311-9316, doi:10.1002/anie.201202544.
5. Fonvielle, M.; Le Du, M.H.; Lequin, O.; Lecoq, A.; Jacquet, M.; Thai, R.; Dubois, S.; Grach, G.; Gondry, M.; Belin, P. Substrate and reaction specificity of Mycobacterium tuberculosis cytochrome P450 CYP121: insights from biochemical studies and crystal structures. *The Journal of biological chemistry* **2013**, *288*, 17347-17359, doi:10.1074/jbc.M112.443853.
6. Kavanagh, M.E.; Coyne, A.G.; McLean, K.J.; James, G.G.; Levy, C.W.; Marino, L.B.; de Carvalho, L.P.; Chan, D.S.; Hudson, S.A.; Surade, S.; et al. Fragment-Based Approaches to the Development of Mycobacterium tuberculosis CYP121 Inhibitors. *Journal of medicinal chemistry* **2016**, *59*, 3272-3302, doi:10.1021/acs.jmedchem.6b00007.
7. Taban, I.M.; Elshihawy, H.; Torun, B.; Zucchini, B.; Williamson, C.J.; Altuwairigi, D.; Ngu, A.S.T.; McLean, K.J.; Levy, C.W.; Sood, S.; et al. Novel Aryl Substituted Pyrazoles as Small Molecule Inhibitors of Cytochrome P450 CYP121A1: Synthesis and Antimycobacterial Evaluation. *Journal of medicinal chemistry* **2017**, *60*, 10257-10267, doi:10.1021/acs.jmedchem.7b01562.
8. Kishk, S.M.; McLean, K.J.; Sood, S.; Smith, D.; Evans, J.W.D.; Helal, M.A.; Gomaa, M.S.; Salama, I.; Mostafa, S.M.; de Carvalho, L.P.S.; et al. Design and Synthesis of Imidazole and Triazole Pyrazoles as Mycobacterium Tuberculosis CYP121A1 Inhibitors. *ChemistryOpen* **2019**, *8*, 995-1011, doi:10.1002/open.201900227.
9. Rajput, S.; McLean, K.J.; Poddar, H.; Selvam, I.R.; Nagalingam, G.; Triccas, J.A.; Levy, C.W.; Munro, A.W.; Hutton, C.A. Structure-Activity Relationships of cyclo(l-Tyrosyl-l-tyrosine) Derivatives Binding to Mycobacterium tuberculosis CYP121: Iodinated Analogues Promote Shift to High-Spin Adduct. *Journal of medicinal chemistry* **2019**, *62*, 9792-9805, doi:10.1021/acs.jmedchem.9b01199.
10. Walter, I.; Adam, S.; Gentilini, M.V.; Kany, A.M.; Brengel, C.; Thomann, A.; Sparwasser, T.; Köhnke, J.; Hartmann, R.W. Structure-Activity Relationship and Mode-Of-Action Studies Highlight 1-(4-Biphenylmethyl)-1H-imidazole-Derived Small Molecules as Potent CYP121 Inhibitors. *ChemMedChem* **2021**, *16*, 2786-2801, doi:10.1002/cmdc.202100283.
11. Nguyen, R.C.; Yang, Y.; Wang, Y.; Davis, I.; Liu, A. Substrate-Assisted Hydroxylation and O-Demethylation in the Peroxidase-like Cytochrome P450 Enzyme CYP121. *ACS catalysis* **2020**, *10*, 1628-1639, doi:10.1021/acscatal.9b04596.
12. Frederickson, M.; Selvam, I.R.; Evangelopoulos, D.; McLean, K.J.; Katariya, M.M.; Tunnicliffe, R.B.; Campbell, B.; Kavanagh, M.E.; Charoensutthivarakul, S.; Blankley, R.T.; et al. A new strategy for hit generation: Novel in cellulo active inhibitors of CYP121A1 from Mycobacterium tuberculosis via a combined X-ray crystallographic and phenotypic screening approach (XP screen). *European journal of medicinal chemistry* **2022**, *230*, 114105, doi:10.1016/j.ejmech.2022.114105.
13. McLean, K.J.; Carroll, P.; Lewis, D.G.; Dunford, A.J.; Seward, H.E.; Neeli, R.; Cheesman, M.R.; Marsollier, L.; Douglas, P.; Smith, W.E.; et al. Characterization of active site structure in CYP121. A cytochrome P450 essential for viability of Mycobacterium tuberculosis H37Rv. *The Journal of biological chemistry* **2008**, *283*, 33406-33416, doi:10.1074/jbc.M802115200.
